# Supplementary material for: Genome-wide association analyses for growth, carcass composition and meat quality traits of Iberian pigs fattened in free open air
Source: Research Square preprint supplement (doi:10.21203/rs.3.rs-7515242/v1), 2025-10-03
Supplement: Supplementary file 1 [file 2596d2c995659214af6fcd29.xlsx]

## Sheet: Suppl. Table S1
Supplementary Table S1: Genomic information of significant SNPs associated with ham yield.
SSC	SNP name	Rs	bp1	A12	A2	Freq3	b4	se	p-value	q-value	Variant effect	Gene5
1	ASGA0002260	rs80808292	33839921	G	A	0.340764	-0.22389	0.0570192	8.61624e-05	0.0948029	upstream gene variant
1	ALGA0003623	rs80967460	56175054	C	A	0.105932	-0.352445	0.0896811	8.49521e-05	0.0948029	intergenic variant
6	ALGA0112621	rs81341242	73007048	A	G	0.0603814	-0.51912	0.123198	2.51199e-05	0.0925044	intergenic variant
6	ASGA0090414	rs81308729	73009550	G	A	0.0518359	-0.508808	0.128065	7.096e-05	0.0948029	intergenic variant
6	MARC0017224	rs81284923	73013769	A	G	0.058	-0.522675	0.1276	4.20004e-05	0.0948029	intergenic variant
8	ALGA0105801	rs81333159	6196333	A	G	0.111229	0.382386	0.0872614	1.17556e-05	0.0556588	intergenic variant
8	ASGA0088986	rs81306997	6561239	G	A	0.21822	0.33726	0.0673837	5.58431e-07	0.0185079	3 prime UTR variant	ZNF518B
8	ASGA0102441	rs81323760	6828177	C	A	0.175847	0.287188	0.0743549	0.000112282	0.0979295	intergenic variant
8	WU_10.2_8_6265476	rs333531017	6883842	G	A	0.260593	0.263541	0.0674957	9.43949e-05	0.0948029	intergenic variant
8	WU_10.2_8_6282086	rs328818294	6900448	G	A	0.261146	0.265018	0.067597	8.83448e-05	0.0948029	intergenic variant
8	WU_10.2_8_6311315	rs320630523	6929677	A	G	0.260593	0.263541	0.0674957	9.43949e-05	0.0948029	intergenic variant
8	WU_10.2_8_6450000	rs345832747	7068373	A	G	0.0985169	0.370254	0.095708	0.000109473	0.0979295	intergenic variant
8	ALGA0046257	rs81400113	8020739	G	A	0.109574	0.351248	0.0896922	8.99735e-05	0.0948029	intergenic variant
8	MARC0096670	rs81276026	8029196	G	A	0.115957	0.347222	0.0873307	7.01014e-05	0.0948029	intergenic variant
8	H3GA0024211	rs81400069	8044371	A	C	0.0902935	0.423045	0.0962678	1.11046e-05	0.0556588	intergenic variant
8	ALGA0046221	rs81399956	8114860	A	G	0.0942797	0.400112	0.0977839	4.28041e-05	0.0948029	intergenic variant
8	ALGA0046186	rs81399698	8225137	G	A	0.148936	0.314042	0.0771017	4.6395e-05	0.0948029	intergenic variant
8	WU_10.2_8_7927889	rs329800453	8511328	C	A	0.110169	0.363117	0.091788	7.62021e-05	0.0948029	intergenic variant
8	WU_10.2_8_8918622	rs319540707	9379578	G	A	0.0932203	0.394039	0.0975065	5.31895e-05	0.0948029	intergenic variant
8	ASGA0037704	rs81400583	9613669	G	A	0.129512	0.324262	0.082551	8.56489e-05	0.0948029	intergenic variant
8	ALGA0046407	rs81401013	10637322	G	A	0.127119	0.336458	0.0823844	4.42679e-05	0.0948029	intergenic variant
8	ASGA0037767	rs81400967	10707547	G	A	0.103814	0.368102	0.0912916	5.52681e-05	0.0948029	intergenic variant
8	ASGA0104317	rs81304287	10834388	G	A	0.150424	0.322795	0.0760084	2.16818e-05	0.089824	intron variant	CC2D2A
8	DRGA0008310	rs341387385	12217635	A	G	0.157839	0.316701	0.0767484	3.6836e-05	0.0948029	intergenic variant
8	WU_10.2_8_16181667	rs328356965	15837295	A	G	0.202331	0.302179	0.0677399	8.1628e-06	0.0541073	intron variant	KCNIP4
8	WU_10.2_8_16071319	rs346092903	15845487	C	A	0.202331	0.302179	0.0677399	8.1628e-06	0.0541073	intron variant	KCNIP4
8	WU_10.2_8_16075305	rs321745578	15849872	G	A	0.202331	0.302179	0.0677399	8.1628e-06	0.0541073	intron variant	KCNIP4
8	ASGA0104576	rs81476740	15864779	A	G	0.202331	0.302179	0.0677399	8.1628e-06	0.0541073	intron variant	KCNIP4
8	WU_10.2_8_16709241	rs346187591	16362363	C	A	0.136653	0.32196	0.082453	9.43154e-05	0.0948029	intergenic variant
8	WU_10.2_8_16735830	rs329679442	16388951	G	A	0.136653	0.32196	0.082453	9.43154e-05	0.0948029	intergenic variant
8	ALGA0046640	rs81405013	16400498	G	A	0.136653	0.32196	0.082453	9.43154e-05	0.0948029	intergenic variant
10	ALGA0058635	rs81424140	41576063	G	A	0.105932	0.364316	0.0894693	4.66171e-05	0.0948029	intron variant	ZNF438
10	WU_10.2_10_46375758	rs323913977	41965217	G	A	0.0985169	0.360346	0.0922017	9.29706e-05	0.0948029	intergenic variant
15	WU_10.2_15_143835976	rs333698977	129904530	A	G	0.448093	-0.254449	0.0655736	0.000104301	0.0979295	intergenic variant
15	ASGA0091472	rs81309974	130020573	C	A	0.417373	-0.24678	0.0637452	0.000108236	0.0979295	intergenic variant
15	SIRI0001312	rs318303466	130037634	A	G	0.417373	-0.24678	0.0637452	0.000108236	0.0979295	intergenic variant
15	WU_10.2_15_144103406	rs328167887	130105084	A	G	0.479873	0.24991	0.0614261	4.7325e-05	0.0948029	intron variant	PID1
15	WU_10.2_15_144376128	rs336210548	130335715	A	G	0.457627	0.253491	0.0631249	5.92668e-05	0.0948029	upstream gene variant
1Chromosomal position of SNPs
2Reference allele
3Reference allele frequency
4SNP effect
5Gene in which the SNP is located

## Sheet: Suppl. Table S2
Supplementary Table S2: Genomic information of significant SNPs associated with loin yield.
SSC	SNP name	Rs	bp1	A12	A2	Freq3	b4	se	p-value	q-value	Variant effect	Gene5
4	H3GA0012532	rs80950146	35702138	G	A	0.179463	0.0802535	0.0202061	7.13502e-05	0.0794387	intron variant
4	WU_10.2_4_39839826	rs321093035	36924009	G	A	0.0834933	0.1125	0.0288002	9.37472e-05	0.080074	intron variant	RGS22
4	ALGA0024651	rs80996716	36966859	A	C	0.0834933	0.1125	0.0288002	9.37472e-05	0.080074	intron variant	RGS22
4	ASGA0019386	rs80828796	36984145	G	A	0.0834933	0.1125	0.0288002	9.37472e-05	0.080074	intron variant	RGS22
4	MARC0107366	rs80829499	38807264	A	G	0.330443	0.0604457	0.0155473	0.00010113	0.0822666	intron variant	MATN2
4	ASGA0019416	rs80787763	38819538	A	G	0.329175	0.060587	0.0155045	9.31773e-05	0.080074	intron variant	MATN2
4	WU_10.2_4_42223245	rs325483016	39171621	A	G	0.071977	0.115183	0.0302248	0.000138467	0.0886637	intergenic variant
4	ASGA0019540	rs80962309	41201195	A	G	0.138196	0.0896744	0.021867	4.1153e-05	0.0740016	intergenic variant
4	ASGA0019705	rs80926181	55890058	G	A	0.333973	0.0685865	0.0155314	1.00543e-05	0.0312286	intron variant	ZNF704
4	ALGA0025172	rs80992100	55910511	C	A	0.333973	0.0685865	0.0155314	1.00543e-05	0.0312286	intron variant	ZNF704
4	ALGA0025355	rs81382019	60670297	C	A	0.294626	0.0627722	0.0164846	0.000140135	0.0886637	intergenic variant
4	ASGA0019938	rs80803396	64491574	A	G	0.136276	0.0907339	0.023025	8.12532e-05	0.080074	intergenic variant
4	ASGA0019940	rs80894431	64582381	A	G	0.0518234	0.132959	0.0326432	4.6392e-05	0.0740483	upstream gene variant
4	ALGA0025497	rs80897298	64608073	G	A	0.385797	0.061466	0.0156462	8.54761e-05	0.080074	intergenic variant
4	ALGA0025512	rs80841902	65014643	G	A	0.130518	0.0902197	0.0233388	0.000110794	0.0836505	intron variant	NCOA2
4	ALGA0025556	rs80862639	66964853	A	G	0.0345489	0.153137	0.0401968	0.000139142	0.0886637	intron variant	PREX2
4	ALGA0025611	rs81382081	68190231	A	G	0.147793	0.114694	0.0211951	6.25476e-08	0.0010685	intergenic variant
4	ALGA0025679	rs81382111	69748937	A	C	0.130178	0.111401	0.0217084	2.87157e-07	0.00327033	intron variant	CYP7B1
4	ASGA0020073	rs80988116	70022189	A	G	0.0364683	0.146418	0.0379131	0.000112496	0.0836505	intergenic variant
4	ASGA0020089	rs80784264	70855274	G	A	0.104607	0.140305	0.0248557	1.65384e-08	0.000565049	intergenic variant
4	ASGA0020103	rs80921057	71056915	A	G	0.0345489	0.153137	0.0401968	0.000139142	0.0886637	intergenic variant
4	ASGA0020184	rs80937006	72600599	A	G	0.0930902	0.121181	0.0261665	3.63645e-06	0.0260908	intron variant	CHD7
4	ALGA0025920	rs80813215	73538831	A	G	0.443378	-0.0675003	0.0156349	1.57955e-05	0.0415129	intergenic variant
4	WU_10.2_4_80397049	rs325894064	73698982	A	G	0.147793	0.0787527	0.0205287	0.000124943	0.0871182	intergenic variant
4	MARC0019918	rs80959844	74231975	A	C	0.0441459	0.139925	0.0351567	6.89028e-05	0.0794387	upstream gene variant	NSMAF
4	ASGA0020328	rs80791615	75168202	A	G	0.442418	0.0583429	0.0150963	0.000111218	0.0836505	intergenic variant
5	MARC0075453	rs80908329	10773593	G	A	0.140115	-0.0845248	0.0216994	9.8097e-05	0.0817457	intron variant	TEX33
6	ALGA0124340	rs81305270	66250398	G	A	0.118042	0.0945967	0.0245299	0.000115073	0.0836505	intergenic variant
6	ALGA0113112	rs81476483	66475413	A	G	0.107486	0.103881	0.0261949	7.31766e-05	0.0794387	intergenic variant
6	WU_10.2_6_76394874	rs332678341	82665346	A	G	0.0950096	0.108928	0.0282306	0.000114087	0.0836505	intergenic variant
6	ASGA0097645	rs81476037	83545020	G	A	0.0942308	0.112938	0.0283778	6.89725e-05	0.0794387	intron variant	PDIK1L
6	MARC0046088	rs81238114	83553285	G	A	0.0940499	0.111457	0.0283847	8.61366e-05	0.080074	3 prime UTR variant	PDIK1L
6	H3GA0053796	rs81346214	87009847	G	A	0.232246	0.0777503	0.0186915	3.18707e-05	0.0680557	intergenic variant
6	ASGA0085394	rs81325810	87009936	G	A	0.232692	0.0773744	0.0187118	3.54852e-05	0.0713167	intergenic variant
6	MARC0045330	rs81237931	87572053	A	C	0.25144	0.0730301	0.018091	5.41829e-05	0.0740483	intron variant	PUM1
6	MARC0002503	rs81293768	87599587	A	C	0.25144	0.0730301	0.018091	5.41829e-05	0.0740483	intron variant	PUM1
6	WU_10.2_6_83435669	rs337558398	89441222	G	A	0.0988484	0.115727	0.0273792	2.37024e-05	0.0578439	intron variant	TRIM62
6	WU_10.2_6_84532025	rs332712505	90653394	G	A	0.329175	-0.0656646	0.0162567	5.36256e-05	0.0740483	intergenic variant
6	WU_10.2_6_78749206	rs320611764	90877973	A	G	0.293269	-0.0684077	0.0169442	5.40863e-05	0.0740483	intergenic variant
6	WU_10.2_6_85968524	rs325793685	92897940	G	A	0.327885	0.0680327	0.0156506	1.38039e-05	0.0393019	intron variant	GRIK3
6	ALGA0109523	rs81337627	92923935	A	G	0.0959693	0.112101	0.0280308	6.35549e-05	0.0794387	intron variant	GRIK3
6	MARC0009093	rs81252001	93681053	G	A	0.096929	0.115166	0.028046	4.02016e-05	0.0740016	intron variant	RSPO1
6	WU_10.2_6_87452732	rs334512187	94439270	C	A	0.380539	0.0575563	0.0149928	0.000123567	0.0871182	intergenic variant
6	H3GA0018478	rs81389802	94536445	A	G	0.0978887	0.118009	0.028023	2.54074e-05	0.0578711	intergenic variant
6	6_87908433	rs344522603	94859630	A	C	0.380539	0.0574281	0.0150708	0.000138654	0.0886637	intron variant	RHBDL2
6	ALGA0036115	rs81390114	95689507	A	G	0.229808	0.0844218	0.0187898	7.02383e-06	0.0301059	intergenic variant
6	ALGA0107778	rs81476356	121319241	G	A	0.40499	0.0608683	0.015414	7.85126e-05	0.080074	intron variant	CELF4
6	WU_10.2_6_134860921	rs324771849	146221276	A	G	0.463532	-0.0610684	0.0150519	4.96702e-05	0.0740483	intron variant	PDE4B
6	ASGA0090570	rs81475844	146301050	A	C	0.463462	-0.0604	0.015055	6.0217e-05	0.0791296	intron variant	PDE4B
6	ASGA0098163	rs81476060	146301604	A	G	0.461538	-0.0595917	0.0150418	7.44028e-05	0.0794387	intron variant	PDE4B
6	WU_10.2_6_135012311	rs330306606	146407813	G	A	0.49904	-0.0664954	0.0146693	5.81654e-06	0.0301059	intron variant	PDE4B
6	WU_10.2_6_135040506	rs332043762	146412857	G	A	0.5	0.0656126	0.0146881	7.9305e-06	0.0301059	intron variant	PDE4B
6	WU_10.2_6_135028013	rs327807336	146425347	A	C	0.5	0.0656126	0.0146881	7.9305e-06	0.0301059	intron variant	PDE4B
6	ALGA0006224	rs80893734	147865580	G	A	0.120921	0.108633	0.0235084	3.81825e-06	0.0260908	intron variant	CACHD1
1Chromosomal position of SNPs
2Reference allele
3Reference allele frequency
4SNP effect
5Gene in which the SNP is located

## Sheet: Suppl. Table S3
Supplementary Table S3: Genomic information of significant SNPs associated with meat quality traits.
SSC	SNP name	Rs	bp1	A12	A2	Freq3	b4	se	p-value	q-value	Variant effect	Gene5
Shear Force
2	H3GA0005676	rs81357736	6774200	A	C	0.47053	-0.509294	0.103687	9.0235e-07	0.0299402	intron variant
2	WU_10.2_2_6179112	rs319898417	7047076	G	A	0.462672	-0.492853	0.102967	1.6972e-06	0.0299402	intron variant	SPDYC
C14:0
8	MARC0030774	rs81225193	111825944	G	A	0.303681	-0.0294267	0.00625829	2.57584e-06	0.0368166	intron variant	ENPEP
8	WU_10.2_8_120142495	rs336391861	112115474	C	A	0.303681	-0.0280513	0.00636349	1.04251e-05	0.0912035	intron variant	ELOVL6
12	WU_10.2_12_1279	rs331568234	709605	A	G	0.460041	-0.0297304	0.00637665	3.12577e-06	0.0368166	upstream gene variant
12	WU_10.2_12_60100	rs322685807	714757	A	G	0.460123	-0.0297227	0.00637773	3.15627e-06	0.0368166	intergenic variant
C16:0
5	DIAS0002107	rs81212572	17896400	G	A	0.199387	-0.296568	0.0735218	5.48956e-05	0.0711198	synonymous variant	KRT71
8	MARC0097057	rs81276088	89447995	A	G	0.313906	-0.23946	0.0603267	7.20595e-05	0.0836731	intergenic variant
8	ALGA0049179	rs81403434	109929994	G	A	0.133947	-0.364465	0.0841834	1.49504e-05	0.0400613	intergenic variant
8	ALGA0049181	rs81403437	109980716	C	A	0.468238	0.234899	0.0565932	3.31526e-05	0.0679336	downstream gene variant
8	WU_10.2_8_118798578	rs343506611	110703786	A	C	0.179959	-0.29161	0.0723102	5.51237e-05	0.0711198	intergenic variant
8	MARC0001137	rs81283973	110720033	G	A	0.179959	-0.29161	0.0723102	5.51237e-05	0.0711198	intergenic variant
8	MARC0040294	rs81232938	110720581	A	G	0.183027	-0.289079	0.0719272	5.84342e-05	0.0726984	intergenic variant
8	MARC0081452	rs81265117	110778427	A	G	0.0879346	-0.416067	0.103101	5.44805e-05	0.0711198	intergenic variant
8	WU_10.2_8_119212563	rs343958478	111130479	A	G	0.433538	0.253482	0.0564742	7.174e-06	0.0226939	intergenic variant
8	WU_10.2_8_119582517	rs325014808	111569348	A	G	0.0858896	-0.422756	0.103641	4.52227e-05	0.0711198	intergenic variant
8	H3GA0025322	rs81403450	111739346	G	A	0.446721	-0.30222	0.0566595	9.60893e-08	0.00250528	downstream gene variant
8	MARC0030774	rs81225193	111825944	G	A	0.303681	-0.312309	0.0611946	3.33357e-07	0.00387083	intron variant	ENPEP
8	ALGA0049202	rs81403466	111899793	G	A	0.436605	0.252618	0.0565126	7.81761e-06	0.0226939	intergenic variant
8	ASGA0039629	rs81403471	111952544	G	A	0.449692	0.238952	0.0565735	2.40276e-05	0.0597858	downstream gene variant
8	ASGA0091658	rs81310214	112005632	G	A	0.38627	-0.269424	0.0582661	3.7635e-06	0.0167844	downstream gene variant
8	WU_10.2_8_120142495	rs336391861	112115474	C	A	0.303681	-0.327	0.0622275	1.43837e-07	0.00250528	intron variant	ELOVL6
8	MARC0049679	rs81240871	112395426	G	A	0.163599	-0.323217	0.0806329	6.11052e-05	0.0734	intron variant	RRG
8	ALGA0049233	rs81403518	112654759	A	G	0.48668	-0.222344	0.0565561	8.44564e-05	0.0949045	upstream gene variant
8	MARC0025408	rs81293549	112754574	A	G	0.408811	-0.281083	0.0586414	1.64098e-06	0.00960749	intron variant	SEC24B
8	WU_10.2_8_121864282	rs328492172	113626217	G	A	0.456879	0.235535	0.0582122	5.20703e-05	0.0711198	intergenic variant
8	ASGA0094405	rs81313564	115968111	A	G	0.195297	-0.304779	0.0752909	5.16533e-05	0.0711198	intron variant	GSTCD
8	WU_10.2_8_131776149	rs339949113	122833599	G	A	0.46319	-0.231011	0.0562148	3.96619e-05	0.0711198	intergenic variant
12	WU_10.2_12_1279	rs331568234	709605	A	G	0.460041	-0.297924	0.0619975	1.54431e-06	0.00960749	upstream gene variant
12	WU_10.2_12_60100	rs322685807	714757	A	G	0.460123	-0.297108	0.0620064	1.6548e-06	0.00960749	intergenic variant
15	MARC0028639	rs80943094	50376698	G	A	0.0296524	-0.624044	0.159772	9.38937e-05	0.0991148	intron variant	UNC5D
15	MARC0030980	rs80930489	50462999	A	G	0.0296524	-0.624044	0.159772	9.38937e-05	0.0991148	intron variant	UNC5D
15	WU_10.2_15_81241799	rs341238670	72727184	A	G	0.0347648	-0.663564	0.145735	5.28319e-06	0.018404	intron variant
15	ALGA0085839	rs81453508	72830096	G	A	0.0347648	-0.663564	0.145735	5.28319e-06	0.018404	intron variant	SCN9A
15	WU_10.2_15_127295381	rs321586867	115188305	G	A	0.206544	-0.293213	0.0705648	3.24954e-05	0.0679336	non coding transcript exon variant
15	ALGA0086892	rs81454413	116134508	G	A	0.254601	-0.291107	0.0720324	5.31473e-05	0.0711198	intron variant	SPAG16
15	MARC0047787	rs81239372	116159270	A	G	0.254601	-0.291107	0.0720324	5.31473e-05	0.0711198	intron variant	SPAG16
15	MARC0074976	rs81260356	117912383	G	A	0.265914	-0.273708	0.0654988	2.93026e-05	0.0679336	non coding transcript exon variant
15	ALGA0086957	rs81454499	118020177	C	A	0.300613	-0.321205	0.0695388	3.8546e-06	0.0167844	intergenic variant
C16:1
8	H3GA0025322	rs81403450	111739346	G	A	0.446721	-0.0700246	0.0159456	1.12584e-05	0.0808173	downstream gene variant
8	MARC0030774	rs81225193	111825944	G	A	0.303681	-0.0791272	0.0172163	4.30574e-06	0.0602282	intron variant	ENPEP
8	ASGA0039629	rs81403471	111952544	G	A	0.449692	0.0704266	0.0158999	9.45124e-06	0.0808173	downstream gene variant
8	ASGA0091658	rs81310214	112005632	G	A	0.38627	-0.0854154	0.0163741	1.82329e-07	0.00654415	downstream gene variant
8	MARC0025408	rs81293549	112754574	A	G	0.408811	-0.0756864	0.0165857	5.03412e-06	0.0602282	intron variant	SEC24B
8	WU_10.2_8_122112654	rs330666338	113852319	A	G	0.30123	-0.0752105	0.0173064	1.38756e-05	0.0830038	intron variant	LEF1
C18:1
12	WU_10.2_12_1279	rs331568234	709605	A	G	0.460041	0.402674	0.0847245	2.00674e-06	0.0367529	upstream gene variant
12	WU_10.2_12_60100	rs322685807	714757	A	G	0.460123	0.401273	0.0847393	2.18636e-06	0.0367529	intergenic variant
C18:2
3	ALGA0018003	rs81379005	22050930	G	A	0.360941	0.143675	0.0322279	8.26945e-06	0.0336535	intron variant	PRKCB
3	MARC0000538	rs81236837	38122142	A	G	0.254601	0.163756	0.0369621	9.40702e-06	0.0340293	intron variant	ADCY9
3	ASGA0014287	rs81369300	38837949	A	G	0.46209	0.138744	0.0334847	3.42046e-05	0.0742398	upstream gene variant
3	WU_10.2_3_40337020	rs338236814	38949132	G	A	0.46209	0.138744	0.0334847	3.42046e-05	0.0742398	upstream gene variant
3	MARC0033704	rs81228599	44434238	A	G	0.248466	0.148805	0.0370028	5.78384e-05	0.0896687	intron variant	MERTK
3	ASGA0104198	rs81304124	44449883	G	A	0.248466	0.148805	0.0370028	5.78384e-05	0.0896687	intron variant	MERTK
3	ALGA0018964	rs81370348	51022229	A	C	0.265849	0.147453	0.0362459	4.7393e-05	0.081209	intergenic variant
3	ASGA0014571	rs81370345	51059992	G	A	0.265849	0.147453	0.0362459	4.7393e-05	0.081209	intergenic variant
3	ALGA0019035	rs81370531	53404921	A	G	0.291411	0.144768	0.035139	3.79112e-05	0.0749988	intron variant	NPAS2
13	ASGA0094530	rs81478326	147531625	G	A	0.297546	0.167303	0.0361965	3.79903e-06	0.0223277	intron variant	SLC9C1
13	DIAS0000614	rs341320025	169821142	A	G	0.381148	0.149012	0.0352216	2.32965e-05	0.0583433	intron variant	CADM2
13	ALGA0072834	rs81441284	170039597	C	A	0.41411	0.15554	0.0356857	1.30888e-05	0.0426131	intergenic variant
13	ALGA0072845	rs80800615	172621505	G	A	0.368852	0.153559	0.0357385	1.73327e-05	0.047025	intergenic variant
13	ASGA0059322	rs80922508	172718895	G	A	0.368852	0.153559	0.0357385	1.73327e-05	0.047025	intergenic variant
13	ALGA0072892	rs80883682	174704755	A	G	0.344262	0.173713	0.037077	2.79714e-06	0.0223277	upstream gene variant
13	INRA0041252	rs321414524	174783671	A	G	0.340164	0.171861	0.0373376	4.16666e-06	0.0223277	intergenic variant
13	ALGA0072897	rs81441348	174898503	A	C	0.359631	0.169779	0.0371239	4.80064e-06	0.0223277	intergenic variant
13	WU_10.2_13_186090829	rs344184955	175543137	A	G	0.357873	0.147815	0.0359441	3.91615e-05	0.0749988	intron variant	ROBO1
13	MARC0049516	rs81241482	176169597	G	A	0.342213	0.174265	0.0371239	2.67746e-06	0.0223277	intron variant	ROBO1
13	DIAS0001078	rs324938004	176369056	C	A	0.32582	0.184988	0.0370527	5.95807e-07	0.0193977	intron variant	ROBO1
13	ASGA0059375	rs81441390	176420512	A	G	0.319672	0.177253	0.0374552	2.21889e-06	0.0223277	intron variant	ROBO1
13	ASGA0059502	rs81441645	180954430	A	G	0.442623	0.142519	0.0356251	6.32002e-05	0.0935275	intergenic variant
C20:1
7	WU_10.2_7_122772188	rs337402586	115653097	A	G	0.0756646	0.100728	0.0218209	3.90995e-06	0.0155929	intergenic variant
7	WU_10.2_7_122776446	rs320539692	115657353	C	A	0.0756646	0.100728	0.0218209	3.90995e-06	0.0155929	intergenic variant
7	WU_10.2_7_122780784	rs321344396	115661689	C	A	0.0469432	0.12597	0.027101	3.34884e-06	0.0155929	downstream gene variant
7	ASGA0036495	rs80822022	115749343	A	G	0.0766871	0.101335	0.0216981	3.00889e-06	0.0155929	intergenic variant
7	WU_10.2_7_123439493	rs325827236	116255475	G	A	0.0817996	0.0862041	0.0209451	3.85975e-05	0.0923561	intergenic variant
7	WU_10.2_7_123436215	rs341540081	116258752	G	A	0.0817996	0.0862041	0.0209451	3.85975e-05	0.0923561	intergenic variant
7	WU_10.2_7_123869789	rs339116901	116654949	A	G	0.091002	0.0859363	0.0201812	2.06042e-05	0.0672296	intergenic variant
7	WU_10.2_7_124255454	rs326312080	117040229	G	A	0.0521472	0.104972	0.0244958	1.82483e-05	0.0654968	intergenic variant
12	ALGA0124548	rs81306574	622808	A	G	0.457055	-0.0650984	0.0124748	1.80488e-07	0.00166944	intergenic variant
12	ALGA0116599	rs81346156	634364	A	G	0.457055	-0.0650984	0.0124748	1.80488e-07	0.00166944	3 prime UTR variant	NARF
12	H3GA0055340	rs81311681	658326	A	G	0.458078	-0.0644229	0.0124555	2.31282e-07	0.00166944	intron variant	CYBC1
12	WU_10.2_12_1279	rs331568234	709605	A	G	0.460041	0.0656913	0.0126672	2.14926e-07	0.00166944	upstream gene variant
12	WU_10.2_12_60100	rs322685807	714757	A	G	0.460123	0.0655158	0.0126693	2.32564e-07	0.00166944	intergenic variant
14	MARC0060657	rs80887919	128724941	G	A	0.443648	-0.0457508	0.0110572	3.50917e-05	0.0923561	intron variant	CACUL1
14	WU_10.2_14_141043341	rs329389257	129519037	A	G	0.371926	-0.0478999	0.0115079	3.15009e-05	0.0923561	intron variant	BAG3
SFA
15	WU_10.2_15_81241799	rs341238670	72727184	A	G	0.0347648	-1.19834	0.26511	6.17925e-06	0.0761647	intron variant
15	ALGA0085839	rs81453508	72830096	G	A	0.0347648	-1.19834	0.26511	6.17925e-06	0.0761647	intron variant	SCN9A
15	ALGA0086957	rs81454499	118020177	C	A	0.300613	-0.575658	0.127794	6.65054e-06	0.0761647	intergenic variant
PUFA
3	ALGA0018003	rs81379005	22050930	G	A	0.360941	0.159119	0.0355526	7.61966e-06	0.0284477	intron variant	PRKCB
3	MARC0000538	rs81236837	38122142	A	G	0.254601	0.183468	0.0407738	6.80641e-06	0.0284477	intron variant	ADCY9
3	ASGA0014287	rs81369300	38837949	A	G	0.46209	0.157761	0.0369371	1.94542e-05	0.0466917	upstream gene variant
3	WU_10.2_3_40337020	rs338236814	38949132	G	A	0.46209	0.157761	0.0369371	1.94542e-05	0.0466917	upstream gene variant
3	MARC0033704	rs81228599	44434238	A	G	0.248466	0.166563	0.0408268	4.50834e-05	0.072136	intron variant	MERTK
3	ASGA0104198	rs81304124	44449883	G	A	0.248466	0.166563	0.0408268	4.50834e-05	0.072136	intron variant	MERTK
3	WU_10.2_3_46416338	rs332052515	44624629	A	G	0.253579	0.162423	0.0403241	5.6271e-05	0.0859442	intergenic variant
3	ALGA0018964	rs81370348	51022229	A	C	0.265849	0.166809	0.0399845	3.02162e-05	0.0564056	intergenic variant
3	ASGA0014571	rs81370345	51059992	G	A	0.265849	0.166809	0.0399845	3.02162e-05	0.0564056	intergenic variant
3	ALGA0019035	rs81370531	53404921	A	G	0.291411	0.163634	0.0387559	2.41957e-05	0.0508128	intron variant	NPAS2
4	ALGA0114483	rs81475494	45534408	A	G	0.205521	0.178474	0.0445875	6.26008e-05	0.0914548	intron variant	SLC26A7
13	ASGA0094530	rs81478326	147531625	G	A	0.297546	0.181736	0.0399176	5.29434e-06	0.0254137	intron variant	SLC9C1
13	DIAS0000614	rs341320025	169821142	A	G	0.381148	0.164906	0.0388423	2.18073e-05	0.0488501	intron variant	CADM2
13	ALGA0072834	rs81441284	170039597	C	A	0.41411	0.171769	0.0393543	1.27309e-05	0.0427773	intergenic variant
13	ALGA0072845	rs80800615	172621505	G	A	0.368852	0.169389	0.0394125	1.72459e-05	0.0466917	intergenic variant
13	ASGA0059322	rs80922508	172718895	G	A	0.368852	0.169389	0.0394125	1.72459e-05	0.0466917	intergenic variant
13	ALGA0072892	rs80883682	174704755	A	G	0.344262	0.191397	0.040888	2.85468e-06	0.0239802	upstream gene variant
13	INRA0041252	rs321414524	174783671	A	G	0.340164	0.189697	0.0411754	4.08402e-06	0.0251083	intergenic variant
13	ALGA0072897	rs81441348	174898503	A	C	0.359631	0.187818	0.0409402	4.48346e-06	0.0251083	intergenic variant
13	WU_10.2_13_186090829	rs344184955	175543137	A	G	0.357873	0.162886	0.039639	3.9695e-05	0.0701999	intron variant	ROBO1
13	MARC0049516	rs81241482	176169597	G	A	0.342213	0.19269	0.0409404	2.51878e-06	0.0239802	intron variant	ROBO1
13	DIAS0001078	rs324938004	176369056	C	A	0.32582	0.203427	0.0408615	6.40952e-07	0.0215367	intron variant	ROBO1
13	ASGA0059375	rs81441390	176420512	A	G	0.319672	0.195419	0.0413053	2.23306e-06	0.0239802	intron variant	ROBO1
1Chromosomal position of SNPs
2Reference allele
3Reference allele frequency
4SNP effect
5Gene in which the SNP is located

## Sheet: Suppl. Table S4
Supplementary Table S5: Genes present within significant QTLs associated with ham and loin yields.
Region	Trait	Genomic position (Mb)	Genes in QTL region
QTL1	% Loin	4:35.70-39.18	LAPTM4B, MATN2, MTDH, NIPAL2, OSR2, PABPC1, POLR2K, POP1, RGS22, RIDA, RNF19A, SNORA72, SNX31, SPAG1, STK3, VPS13B, ZNF706, ANKRD46, FBX043, COX6C, KCNS2
QTL2	% Loin	4:55.89-55.91	ZNF704
QTL3	% Loin	4:64.49-75.17	ADHFE1, ARFGEF1, ARMC1, ASPH, BHLHE22, C8orf34, CLVS1, COPS5,CPA6, CSPP1, CYP7A1, CYP7B1, DNAJC5B, FAM110B, GGH, LACTB2, MTFR1, MYBL1, NCOA2, NKAIN3, NSMAF, PDE7A, PPP1R42, PRDM14, PREX2, RAB2A, RRS1, SDCBP, SGK3, SLCO5A1, SNORD87, TOX, , TRIM55, TTPA, UBXN2B, VCPIP1, XKR9, YTHDF3
QTL4	% Ham	6:73.01-73.02
QTL5	% Loin	6:66.25-66.48
QTL6	% Loin	6:82.66-83.56	SYF2, RSRP1, TMEM50A, RHCE, MACO1, LDLRAP1, MAN1C1, SELENON, MTFR1L, AUNIP, PAQR7, STMN1, PAFAH2, EXTL1, SLC30A2, TRIM63, PDK1L
QTL7	% Loin	6:87.01-90.88	A3GALT2, ADGRB2, AZIN2, BSDC1, C1orf94, CCDC28B, OL16A1, DCDC2B, EIF3I, FABP3, FAM167B, FNDC5, HCRTR1, HDAC1, HMGB4, HPCA,I QCC, KHDRBS1, KPNA6, LAPTM5, LCK, MARCKSL1, MATN1, NKAIN1, PEF1, PHC2, PTP4A2, PUM1, RNF19B, S100PBP, SDC3, SERINC2, SNRNP40, SPOCD1, SYNC, TINAGL1, TMEM234, TMEM39B, TMEM54, TRIM62, TXLNA, YARS1, ZBTB8A, ZBTB8B, ZBTB8OS, ZCCHC17, ZNF362, ZSCAN20, NHSL3
QTL8	% Loin	6:92.89-94.86	GRIK3, RSPO1, RHBDL2, ZC3H12A, MEAF6, SNIP1, DNALI1, GNL2, AIRIM, CDCA8, MANEAL, YRDC, INPP5B, EPHA10, C1orf122, MTF1, SF3A3, FHL3, UTP11, POU3F1, RRAGC, MYCBP, GJA9
QTL9	% Loin	6:146.22-147.87	LEPR, LEPROT, DNAJC6, JAK1, RAVER,CACHD1, PDE4B
QTL10	% Ham	8:6.19-12.22	BOD1L1, BST1, C1QTNF7, CC2D2A ,CD38, CLNK, CPEB2, FBXL5, FGFBP1, HS3ST1, LDB2, NKX3-2, PROM1, RAB28, SLC2A9, TAPT1, WDR1, ZNF518B
QTL11	% Ham	8:15.83-16.40	KCNIP4
QTL12	% Ham	10:41.57-41.97	ZNF438
QTL13	% Ham	15:129.90-130.34	PID1

## Sheet: Suppl. Table S5
Supplementary Table S5: Genes present within significant QTLs associatedwith meat quality traits.
Region	Trait	Genomic position (Mb)	Genes in QTL region
QTL14	Shear Force	2:6.77-7.05	SLC25A45, DPF2, TIGD3, CDC42EP2, POLA2, CAPN1, SPDYC
QTL15	C18:2	3:38.12-38.95	ADCY9, CREBBP, TRAP1, DANASE1, SLX4, NLRC3, CLUAP1, NAA60, ZNF174, OR2C1, TIGD7
QTL16		3:44.43-44.63	MERTK, ANAPC1
QTL17		3:51.02-51.06
QTL15	PUFA	3:38.12-38.95	ADCY9, CREBBP, TRAP1, DANASE1, SLX4, NLRC3, CLUAP1, NAA60, ZNF174, OR2C1, TIGD7
QTL16		3:44.43-44.63	ANAPC1
QTL17		3:51.02-51.06
QTL18	C20:1	7:115.65-117.04	SERPINA11, SERPINA5, SERPINA4, SERPINA3-2, SERPINA12, GSD, DICER, CLMN, SYNE3, GLRX5, TCL1B-11, CALMIN
QTL19	C14:0	8:109.92-113.86
QTL19	C16:0	8:109.92-113.86	ALPK1, AP1AR, CASP6, CFI, COL25A1, EGF, ELOVL6, ENPEP, ETNPPL, FAM241A, GAR1, LARP7, LRIT3, MCUB, NEUROG2, OSTC, PITX2, PLA2G12A, RRH, SEC24B, TIFA, ZGRF1
QTL19	C16:1	8:109.92-113.86	CASP6, CFI, COL25A1, EGF, ELOVL6, ENPEP, ETNPPL, GAR1, LEF1, LRIT3, MCUB, OSTC, PLA2G12A, RRH, SEC24B
QTL20	C14:0	12:0.623-0.715
QTL20	C16:0	12:0.623-0.715
QTL20	C18:1	12:0.623-0.715
QTL20	C20:1	12:0.623-0.715	NARF, CYBC1, HEXD, OGFOD3
QTL21	C18:2	13:169.82-170.04	CADM2
QTL22		13:172.62-176.42	GBE1, ROBO1
QTL21	PUFA	13:169.82-170.04	CADM2
QTL22		13:172.62-176.42	GBE1, ROBO1
QTL23	C20:1	14:128.72-129.82	CACUL1, NANOS1, EIF3A, DENND10, SFXN4, PRDX3, GRK5, RGS10, TIAL1, BAG3
QTL24	C16:0	15:50.37-50.47	UNC5D
QTL25		15:72.72-72.83	SCN9A
QTL26		15:115.18-118.02	IKZF2, SPAG16, VWC2L, BARD1, ATIC
QTL25	SFA	15:72.72-72.83	SCN9A

## Sheet: Suppl. Table S6
Supplementary Table S6: Fixed effects and covariates included in the model for each trait.
		1Fixes effects		Covariates
Average daily gain, kg/d		Production batch		-	-	-
Carcass yield, %		Production batch		-	-	-
Ham yield, %		Production batch		-	-	-
Shoulder yield, %		Production batch		-	-	-
Loin yield, %		Production batch		-	-	-
Premium cuts yield, %		Production batch		-	-	-
Intramuscular fat, IMF		Production batch		2Weight gain Montanera	3BW pre-Montanera	-
Fatty acids		Production batch		2Weight gain Montanera	3BW pre-Montanera	-
Protein,%		Production batch		-	-	-
Moisture,%		Production batch		-	-	-
Instrumental Color (L*,a*, b*)		Production batch		IMF	Final age	-
Shear force, N		Production batch		IMF	Final age	-
Thawing loss, %		Production batch		IMF	Final age	loin weight
Cooking loss, %		Production batch		IMF	Final age	loin weight
1Production batch is the combination of slaughter date and fattening group.
2Weight gain during Montanera
3Body weight at the start of Montanera
